# Supplementary material for: Long Noncoding RNA pancEts-1 Promotes Neuroblastoma Progression through hnRNPK-Mediated β-Catenin Stabilization
Source: Oxford University Press journal article supplement (doi:10.1158/0008-5472.can-17-2295), 2018-01-08
Supplement: 00085472can172295-sup-187047_2_supp_4474967_p1nvvh.doc [file 00085472can172295-sup-187047_2_supp_4474967_p1nvvh.doc]

**Supplementary Table S6 Univariate and multivariate analysis of prognostic factors**

**in 88 NB patients derived from public dataset (GSE16476)**

| **Variables** | ***n*** | **Univariate analysis** | | **Multivariate analysis** | | |
| --- | --- | --- | --- | --- | --- | --- |
|  |  | Mean ± SEM (months) | *P*-value | Hazard ratio | 95% CI | *P*-value |
| Age |  |  |  |  |  |  |
| ≤18 months | 48 | 243.6 ± 8.6 | <0.001 | 3.225 | 2.121-6.056 | <0.001 |
| >18 months | 40 | 63.1 ± 13.1 |  |  |  |  |
|  |  |  |  |  |  |  |
| Gender |  |  |  |  |  |  |
| Male | 53 | 154.8 ± 15.1 | 0.819 | 1.232 | 1.002-2.123 | 0.567 |
| Female | 35 | 169.5 ± 19.7 |  |  |  |  |
|  |  |  |  |  |  |  |
| *MYCN* amplification | |  |  |  |  |  |
| No | 72 | 194.4 ± 12.7 | <0.001 | 2.215 | 1.416-3.523 | <0.001 |
| Yes | 16 | 29.4 ± 8.9 |  |  |  |  |
|  |  |  |  |  |  |  |
| INSS stages | |  |  |  |  |  |
| Stage 1 | 8 | 147.6 ± 11.2 |  |  |  |  |
| Stage 2 | 15 | 139.1 ± 8.3 |  |  |  |  |
| Stage 3 | 13 | 121.8 ± 10.2 | <0.001 | 2.127 | 1.435-2.721 | <0.001 |
| Stage 4 | 40 | 54.4 ± 6.9 |  |  |  |  |
| Stage 4S | 12 | 173.8 ± 12.2 |  |  |  |  |
|  |  |  |  |  |  |  |
| pancEts-1 expression | |  |  |  |  |  |
| Low | 65 | 187.3 ± 14.1 | 0.002 | 2.066 | 1.012-4.358 | 0.045 |
| High | 23 | 110.3 ± 23.4 |  |  |  |  |
|  |  |  |  |  |  |  |
| hnRPNK expression | |  |  |  |  |  |
| Low | 58 | 193.6 ± 14.7 | <0.001 | 1.834 | 1.056-3.111 | 0.027 |
| High | 30 | 117.9 ± 20.9 |  |  |  |  |

INSS, international neuroblastoma staging system; pancEts-1, Ets-1 promoter-associated non-coding RNA; hnRNPK, heterogeneous nuclear ribonucleoprotein K; Log-rank test and Cox regression model were applied for univariate and multivariate analysis. *n*, number of patients; SEM, standard error of the mean; 95% CI, 95% confidence interval.
