# Supplementary material for: Long Noncoding RNA pancEts-1 Promotes Neuroblastoma Progression through hnRNPK-Mediated β-Catenin Stabilization
Source: Oxford University Press journal article supplement (doi:10.1158/0008-5472.can-17-2295), 2018-01-08
Supplement: 00085472can172295-sup-187047_2_supp_4474969_p1nvv7.doc [file 00085472can172295-sup-187047_2_supp_4474969_p1nvv7.doc]

**Supplementary Table S1 Primer sets used for RACE, qRT-PCR, RIP, probe, and ChIP**

| **Primer set** | **Primers** | **Sequence** | **Product size (bp)** | **Application** |
| --- | --- | --- | --- | --- |
| pancEts-1 | F1 | 5'-GGAAGAGATGGCTGCTCAGA-3' | 223 | qRT-PCR |
| R1 | 5'-GCAGGACCATCCACTACATT-3' |  |  |
| pancEts-1 | GP1 | 5'-GCTGTCTGCAGTTTCTTTAGACTA-3' |  | 3'-RACE |
| GP2 | 5'-CCTCTGGTAAATAGGAGTGCTGGA-3' |  | 5'-RACE |
| NP1 | 5'-CTTGGCATGGGCTGTCAGGAGAGA-3' |  | 3'-RACE |
| NP2 | 5'-GGCATCTGGTTCTAGTACTGACAC-3' |  | 5'-RACE |
| pancEts-1 | F2 | 5'-ACACCCTTGAGACACAAGACAGGA-3' | 138 | RIP, probe |
| R2 | 5'-ACCATAGTGTGGTTATCCTGCAAT-3' |  |  |
| hnRNPK | F | 5'-TGCGAGTTGAGGCTGTTGATTC-3' | 240 | qRT-PCR |
| R | 5'-AGGCTGTGCACGTCCTTTGATG-3' |  |  |
| DDR2 | F | 5'-CTCTCCTATGGCACCCACAACC-3' | 186 | qRT-PCR |
| R | 5'-ATTTCATCATCCAGCATCCTCC-3' |  |  |
| DLG1 | F | 5'-AGAGCGATGAGGTCGGAGTG-3' | 134 | qRT-PCR |
| R | 5'-GCCTTTTGATCCCATGTCGT-3' |  |  |
| Ets-1 | F | 5'-GAAGTCGTCACCCCAGACAACA-3' | 254 | qRT-PCR |
| R | 5'-TCAGCACGGTCCCGCACATAGT-3' |  |  |
| PCDH7 | F | 5'-AACGCCGAGATCGCCTACTC-3' | 153 | qRT-PCR |
| R | 5'-GGGGATGCCTTTGTCTTTGG-3' |  |  |
| PNPT1 | F | 5'-TTTGTATCCTGTTATTCCCCGA-3' | 172 | qRT-PCR |
| R | 5'-GACCAATCCTATTGCTACGCCT-3' |  |  |
| U1 | F | 5'-ACTTACCTGGCAGGGGAGATACC-3' | 137 | qRT-PCR |
| R | 5'-CCACTACCACAAATTATGCAGTCG-3' |  |  |
| GAPDH | F | 5'-GGGCTGCTTTTAACTCTGGT-3' | 198 | qRT-PCR |
| R | 5'-TGATTTTGGAGGGATCTCGC-3' |  |  |
| DDR2  (-39/+161) | F | 5'-TGATTGGTGACTTTCCTTCTTCCC-3' | 200 | ChIP |
| R | 5'-AACGCTTCTTTTTCCACTTTGCTG-3' |  |  |
| DLG1 (-441/-195) | F | 5'-TTGGGTAACACCTGCGATGC-3' | 247 | ChIP |
| R | 5'-TCCCTTAGTAATAGGCTTGG-3' |  |  |
| Ets-1  (-605/-407) | F | 5'-TCCTTCAGAAACACACGCCCT-3' | 199 | ChIP |
| R | 5'-CCCCCTCCCAGTAGCAGCATA-3' |  |  |
| PCDH7  (-333/-201) | F | 5'-GGGCATCTTTGTTAATTGCCGT-3' | 133 | ChIP |
| R | 5'-AATGCAGGGAACTCAAGCTG-3' |  |  |
| PNPT1  (-527/-299) | F | 5'-AGTTCGACCAAAAGGGACAG-3‘ | 229 | ChIP |
| R | 5'-GTGGTGGGCCTTGGAAAGAG-3' |  |  |

pancEts-1, Ets-1 promoter-associated non-coding RNA; DDR2, discoidin domain receptor tyrosine kinase 2; DLG1, discs large 1; Ets-1, v-ets erythroblastosis virus E26 oncogene homolog 1; PCDH7, protocadherin 7; PNPT1, polyribonucleotide nucleotidyltransferase 1; GAPDH, glyceraldehyde 3-phosphate dehydrogenase; ChIP, chromatin immunoprecipitation; F, forward; R, reverse; GP, gene specific primer; NP, nested gene specific primer.
