# Supplementary material for: Long Noncoding RNA pancEts-1 Promotes Neuroblastoma Progression through hnRNPK-Mediated β-Catenin Stabilization
Source: Oxford University Press journal article supplement (doi:10.1158/0008-5472.can-17-2295), 2018-01-08
Supplement: 00085472can172295-sup-187047_2_supp_4474972_p1nvvf.doc [file 00085472can172295-sup-187047_2_supp_4474972_p1nvvf.doc]

**Supplementary Table S5 hnRNPK expression in human NB tissues**

| **Group** | **Total number** | **hnRNPK expression** | | | | **Positive rates (%)** | ***P*-Value** |
| --- | --- | --- | --- | --- | --- | --- | --- |
|  |  | − | + | ++ | +++ |  |  |
| Age |  |  |  |  |  |  |  |
| <1 year | 20 | 5 | 3 | 5 | 7 | 75.0 | 0.848 |
| ≥1 year | 22 | 6 | 4 | 7 | 5 | 72.7 |  |
|  |  |  |  |  |  |  |  |
| Differentiation |  |  |  |  |  |  |  |
| Well differentiated | 20 | 9 | 4 | 3 | 4 | 55.0 | 0.031 |
| Poorly differentiated | 22 | 2 | 3 | 9 | 8 | 90.9 |  |
|  |  |  |  |  |  |  |  |
| MKI |  |  |  |  |  |  |  |
| <200 | 19 | 9 | 4 | 3 | 3 | 52.6 | 0.016 |
| >200 | 23 | 2 | 3 | 9 | 9 | 91.3 |  |
|  |  |  |  |  |  |  |  |
| INSS stages |  |  |  |  |  |  |  |
| Stage 1-2 | 14 | 7 | 4 | 3 | 0 | 50.0 |  |
| Stage 3-4 | 20 | 2 | 1 | 6 | 11 | 90.0 | 0.006 |
| Stage 4S | 8 | 2 | 2 | 3 | 1 | 75.0 |  |
|  |  |  |  |  |  |  |  |
| *MYCN* amplification |  |  |  |  |  |  |  |
| No | 33 | 9 | 6 | 9 | 9 | 72.7 | 0.927 |
| Yes | 9 | 2 | 1 | 3 | 3 | 77.8 |  |

hnRNPK, heterogeneous nuclear ribonucleoprotein K; MKI, mitosis karyorrhexis index; INSS, international neuroblastoma staging system.
