# Supplementary material for: Long Noncoding RNA pancEts-1 Promotes Neuroblastoma Progression through hnRNPK-Mediated β-Catenin Stabilization
Source: Oxford University Press journal article supplement (doi:10.1158/0008-5472.can-17-2295), 2018-01-08
Supplement: 00085472can172295-sup-187047_2_supp_4474974_p1nvvj.doc [file 00085472can172295-sup-187047_2_supp_4474974_p1nvvj.doc]

**Supplementary Figure Legends**

**Supplementary Figure S1 Schematic positions for primers.** Schematic diagrams showing the positions at which the primers attach to amplify the sequence of pancEts-1 (**A**), hnRNPK (**B**), or β-catenin (**C**).

**Supplementary Figure S2 Characterization of a novel lncRNA pancEts-1. A**, 5'- and 3'-RACE assays for identifying the full-length sequence of *pancEts-1*. **B**, real-time quantitative RT-PCR indicating the pancEts-1 levels (normalized to GAPDH) in human embryonic tissues (at day 50 of gestation). **C**, ribosome profiling data showing the protein-coding potential of *pancEts-1*. **D**, mining of publicly available datasets (54 studies) derived from cBioPortal for Cancer Genomics (http://cbioportal.org) indicating the frequency of mutation, deletion, or amplification of *pancEts-1* gene in human cancers.

**Supplementary Figure S3 Expression and Kaplan–Meier survival curves of pancEts-1 downstream genes. A** and **B**, dual-luciferase assay indicating the activity of transcription factor luciferase reporters in NB cells stably transfected with mock, *pancEts-1*, sh-Scb, or sh-pancEts-1 #2 (mean ± SD, n=5). **C**, the expression correlation between *pancEts-1* and downstream target genes *DDR2*, *Ets-1*, *LRRC2*, *PCDH7*, and *PNPT1* in NB tissues derived from microarray dataset (GSE16476). **D**, real-time qRT-PCR showing the expression (normalized to GAPDH) correlation of *pancEts-1* with *DDR2*, *Ets-1*, *LRRC2*, *PCDH7*, or *PNPT1* in NB tissues (n=42). **E**, mining of publicly available microarray dataset (GSE16476) indicating the survival curve of NB patients with high or low levels of *DDR2*, *Ets-1*, *LRRC2*, *PCDH7*, and *PNPT1*. Student’s *t* test for analyzing the difference in **A** and **B**. Pearson’s correlation coefficient analysis in **C** and **D**. Log-rank test for survival comparison in **E**.

**Supplementary Figure S4 Expression of β-catenin and hnRNPK in NB cells. A**, real-time quantitative RT-PCR indicating the *β-catenin* transcript levels (normalized to GAPDH) in NB cells stably transfected with empty vector (mock), *pancEts-1*, scramble shRNA (sh-Scb), or sh-pancEts-1 #2. **B**, western blot showing the hnRNPK protein levels in NB cells stably transfected with sh-Scb, sh-hnRNPK #1, or sh-hnRNPK #2. Student’s *t* test for analyzing the difference in **A**.

**Supplementary Figure S5 pancEts-1 facilitates the β-catenin activity and downstream gene expression in NB cells. A**, ChIP and qPCR assay showing the binding of β-catenin and LEF1 to target gene promoters in BE(2)-C cells stably transfected with scramble shRNA (sh-Scb) or sh-pancEts-1 #2, and those co-transfected with empty vector (mock) or *hnRNPK*. **B** and **C**, real-time quantitative RT-PCR (B, mean ± SD, n=4, normalized to GAPDH) and western blot (C) assays indicating the transcript and protein levels of β-catenin downstream genes in BE(2)-C cells stably transfected with sh-Scb or sh-pancEts-1 #2, and those co-transfected with mock or *hnRNPK*. **D** and **E**, representative images (left panel) and quantification (right panel) of soft agar (D) and transwell matrigel invasion (E) assays indicating the anchorage-independent growth and invasion capability of SK-N-SH cells stably transfected with mock or *pancEts-1*, and those co-transfected with sh-Scb or sh-hnRNPK #1 (mean ± SD, n=6). Student’s *t* test for analyzing the difference in **A**, **B**, **D**, and **E**. **P*<0.01 vs. sh-Scb+mock.
